# Supplementary material for: TROP2 expression is associated with early stage and favorable prognosis in Upper tract urothelial carcinoma
Source: Research Square preprint supplement (doi:10.21203/rs.3.rs-7734563/v1), 2025-11-06
Supplement: Supplementary file 1 [file 8b6d752398c1e01844d5422a.docx]

**Gene set enrichment analysis (GSEA)**

The GSEA software was downloaded from https://www.gsea-msigdb.org, and samples were divided into *TACSTD2*-high and *TACSTD2*-low groups. The gene sets of “h.all.v2024.1.\\hs.symbols.gmt” were downloaded from the Molecular Signatures Database. The number of permutations was set at 1000. Normalized enrichment scores, the nominal *P* value (NOM *P* value), and false discovery rate (FDR) Q value were acquired. NOM *P*<0.05 and FDR Q<0.25 were considered to indicate significant enrichment.

**Oncoplot analysis**

An oncoplot was generated from the gene mutation dataset of Fujii et al. [22], using Python 3.0 in Jupyter Notebook (ver. 6.3.0), an interactive computational environment. The scripts were described previously [24].

**Protein‒protein interaction (PPI) network analysis**

The Search Tool for the Retrieval of Interacting Genes (https://string-db.org/) was used to construct a PPI network between *TACSTD2* and related proteins. The minimum required interaction score was set to median confidence values (0.400).

**Screening of differentially expressed genes (DEGs)**

According to the RNA-seq database, we divided patients into *TACSTD2*-high and *TACSTD2*-low groups, and DEGs were screened via a volcano plot. The threshold was a 2-fold change, and adjusted *P*<0.05. The volcano map, uniform manifold approximation and projection (UMAP), and t‑distributed Stochastic Neighbor Embedding (t-SNE) of DEGs were constructed by installing Python 3.0 on Jupyter Notebook. The scripts were described previously [24].

**Gene ontology and functional enrichment**

To determine the biological function of *TACSTD2* and its related DEGs, we annotated them with Gene Ontology (GO), Kyoto Encyclopedia of Genes and Genomes (KEGG), DAVID v6.8 (<https://david.ncifcrf.gov/>) and Shiny Go 0.82 (https://bioinformatics.sdstate.edu/go/). Gene Ontology analysis results were categorized into biological process (BP), molecular function (MF), and cellular component (CC) categories. Results with FDR<0.05 were considered statistically significant.

**Statistical analysis**

All statistical analyses were performed using SPSS (SPSS Inc., Chicago, IL, USA). Correlations between clinicopathological parameters and TROP2 expression were analyzed using Fisher’s exact test. Kaplan–Meier survival curves were constructed to compare survival of TROP2-high and TROP2-low patients. Statistical significance of differences between survival curves was tested by a log-rank test. Univariate and multivariate Cox proportional hazards regression analyses were performed to evaluate associations of clinical covariates with survival. Expression was compared between two groups by the Wilcoxon signed-rank test. *P* values of <0.05 were considered statistically significant.
